# Supplementary material for: Spectroscopic study of the authentic emitter of AMPPD chemiluminescence in alkaline aqueous solution
Source: Royal Society of Chemistry journal article supplement (doi:10.1039/b922244h), 2010-01-01
Supplement: b922244h.pdf [file b922244h.pdf]

## Spectroscopic Study of the Authentic Emitter of AMPPD Chemiluminescence in Alkaline Aqueous Solution

Langping Tu,<sup>a,b,c</sup> Yu Wang<sup>a,b,c</sup> Yifei Yang,<sup>a,b</sup> Bert H. Bakker,<sup>c</sup> Xianggui Kong,<sup>a,\*</sup> Albert M. Brouwer,<sup>c</sup> Wybren J. Buma<sup>c</sup> and Hong Zhang<sup>c,\*</sup>

<sup>a</sup> Key Laboratory of Excited-State Processes, Changchun Institute of Optics Fine Mechanics and Physics, Chinese Academy of Sciences, Changchun 130033, P. R. China

<sup>b</sup> Graduate School of Chinese Academy of Sciences, Beijing 100039, China

<sup>c</sup> Van't Hoff Institute for Molecular Sciences, University of Amsterdam, Nieuwe Achtergracht 166, 1018 WV Amsterdam, The Netherlands

### SUPPORTING INFORMATION

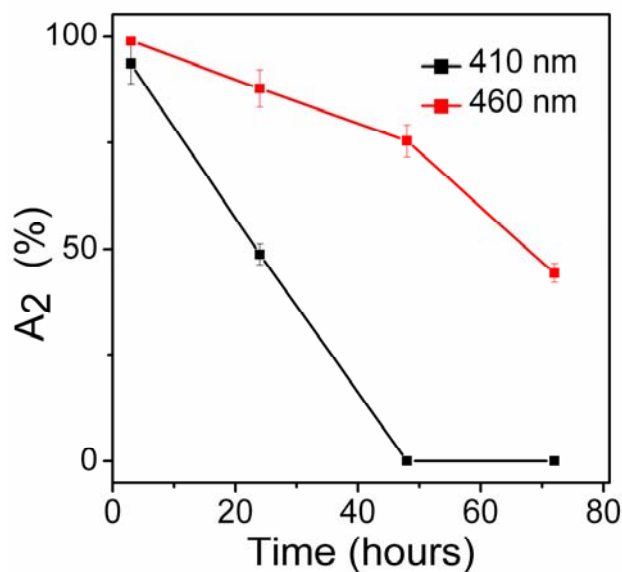

**Fig. S1** The shorter lifetime component ( $A_2$ ) of equation (2) for the solution A (pH ~ 10) at different times after the preparation of solution A.

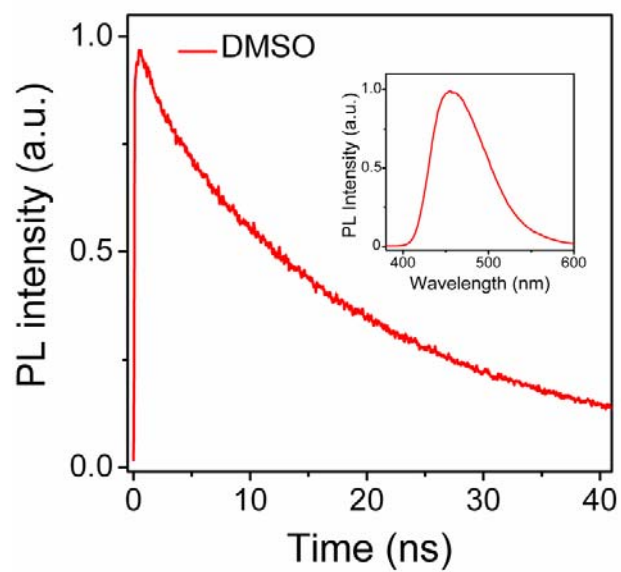

**Fig. S2** The PL decay curve ( $\lambda = 460$  nm) of **M2** in DMSO. Inset shows the steady-state emission spectrum of **M2** ( $\lambda_{\text{max}} \sim 460$  nm) with 320 nm excitation.
